# Supplementary material for: A Pd/Cu-Free magnetic cobalt catalyst for C–N cross coupling reactions: synthesis of abemaciclib and fedratinib
Source: Royal Society of Chemistry journal article supplement (doi:10.1039/d1gc00518a), 2021-01-01

**Supporting Information:**

**Pd/Cu-free Magnetic Cobalt Catalyst for C-N cross Coupling Reactions: Synthesis of Abemaciclib  
and Fedratinib**

Zahra Khorsandi<sup>a</sup>, Abdol R. Hajipour<sup>a,b\*</sup>, Mohammad R. Sarfjou<sup>a</sup>, Rajender S. Varma<sup>c\*</sup>

*<sup>a</sup>Department of Chemistry, Isfahan University of Technology, Isfahan 8415683111, Iran, E-mail:*

*haji@cc.iut.ac.ir*

*<sup>b</sup>Department of Neuroscience, University of Wisconsin, Medical School, 1300 University Avenue,*

*Madison, 53706-1532, WI, USA*

*<sup>c</sup>Regional Centre of Advanced Technologies and Materials, Czech Advanced Technology and Research*

*Institute, Palacký University in Olomouc, Šlechtitelů 27, 783 71, Olomouc, Czech Republic*

## Experimental

### 2.1. General remarks

All the chemicals used were bought from Aldrich Chemical Company or Merck. The  $^1\text{H}$  and  $^{13}\text{C}$  NMR spectra were documented in  $\text{CDCl}_3$  on Bruker Avance, 400 MHz and 100 MHz respectively. The Perkin-Elmer FT-IR spectrophotometer was applied for recording the FT-IR spectra. Transmission Electron Micrographs (TEM) were gotten using Philips CM-200. SEM images were recorded using FE-SEM JSM-7600F. A Bruker AXSDB X-ray diffractometer using  $\text{Cu K}\alpha$  radiations was used to record the X-ray diffractogram (XRD) were recorded in 2 theta range of  $10\text{--}80^\circ$ .

### 2.2. Synthesis of catalyst

For the synthesis of magnetic nanoparticles, ammonical solution (30 mL, 24 mL water and 6 mL  $\text{NH}_4\text{OH}$ ) of  $\text{FeSO}_4$  (2.4 g) and  $\text{Fe}_2(\text{SO}_4)_3$  (7 g) was dispersed in deionized water (50 mL) and ultrasonicated for 30 min to get a stable ferrofluid. The obtained magnetic nanoparticles (MNPs) were filtered, washed with deionized water ( $3\times 10$  mL), methylene chloride ( $3\times 10$  mL) and dried under vacuum. For the coating of various edible natural ligands (mannitol, sorbitol, xylitol, tartaric acid, malic acid and citric acid) over the surface of MNPs, the mixture of MNPs and ligand (0.2 g) was stirred in deionized water (10 mL) at  $60^\circ\text{C}$  for 7 h. Brown precipitates of ligand@MNPs were separated magnetically, washed with deionized water ( $3\times 10$  mL) and dried under vacuum. Finally, for the immobilization of cobalt species onto ligand@MNPs,  $\text{CoCl}_2\cdot 6\text{H}_2\text{O}$  (0.2 g) solvated on ethanol were added into the dispersed solution of ligand@MNPs (1 g) in ethanol (10 mL) and stirred for 3 h at room temperature. The Co-ligand@MNPs was separated magnetically and washed successively with ethanol ( $3\times 25$  mL) and deionized water ( $3\times 25$  mL). Finally, it was dried under vacuum at room temperature to get the final catalyst as dark brown powder.

### 2.3. General procedure for the C-N cross-coupling reaction catalyzed by Co-MTL@MNPs

A mixture of aryl halide (1 mmol), amine (1.2 mmol),  $K_2CO_3$  (4 eq.) and Co-MTL@MNPs (10 mg, 0.22 mol% Co); mannitol was identified as the best ligand) in gamma-valerolactone (GVL) (5 mL) was stirred in a round bottom flask (50 mL) at room temperature till the completion of reaction (monitored by TLC). After that, the catalyst was removed via external magnet and washed with EtOAc (3×5 mL) followed by deionized water (3×10 mL). It was dried under vacuum for 2 h. The organic fraction was washed with brine solution and dried over anhydrous  $Mg_2SO_4$ . Finally, the product was obtained by the removal of the solvent under reduced pressure, the yield of product was evaluated by using gas chromatography applying decane as internal standard; the product was purified through silica gel chromatography using EtOAc-pet ether.

### 2.4. Synthesis procedure for Fedratinib preparation via C-N coupling reaction catalyzed by Co-MTL@MNPs

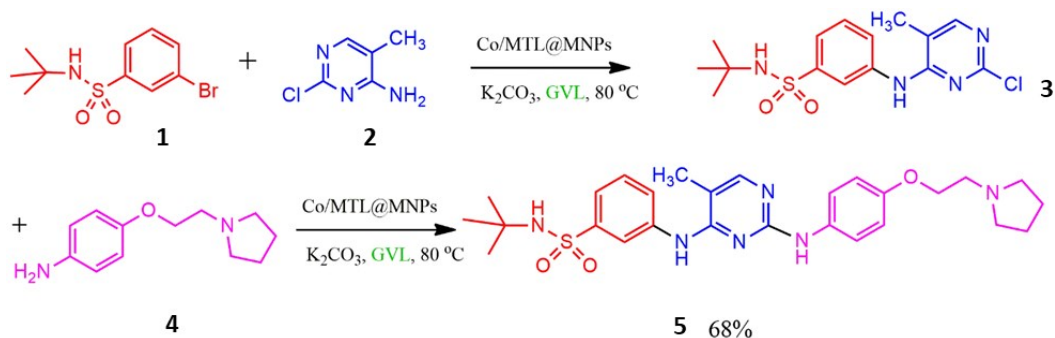

A mixture of **1** (3-bromo-N-(tert-butyl)benzenesulfonamide) (0.5 mmol, 146.5 mg), 2-chloro-5-methylpyrimidin-4-amine (0.6 mmol, 86.2 mg),  $K_2CO_3$  (4 eq.) and Co-MTL@MNPs (10 mg, 0.22 mol% Co) in gamma-valerolactone (GVL) (5 mL) was stirred in a round bottom flask (50 mL) at 80 °C till the completion of reaction (18 h, monitored by TLC). Next, the reaction mixture was cooled to room temperature. The catalyst was removed by external magnet and washed with EtOAc (3×5 mL) followed by deionized water (3×10 mL). After extraction with ethyl acetate, the product was purified by flash column chromatography using EtOAc-pet.ether (65 % yield). The product was applied in next reaction as precursor.

In next step, A mixture of **3** (N-(tert-butyl)-3-((2-chloro-5-methylpyrimidin-4-yl)amino)benzenesulfonamide) (0.3 mmol, 106 mg) and 4-(2-(pyrrolidin-1-yl)ethoxy)aniline (0.31 mmol, 63.9 mg) K<sub>2</sub>CO<sub>3</sub> (4 eq.) and Co-MTL@MNPs (0.1 g, 1.84 mol% Co) in gamma-valerolactone (GVL) (5 mL) was stirred in a round bottom flask (50 mL) at 80°C till the completion of reaction (24 h, monitored by TLC). After that, the reaction mixture was cooled to room temperature. The catalyst was removed by external magnet and washed with EtOAc (3×5 mL) followed by deionized water (3×10 mL). After extraction with ethyl acetate, the product was purified by flash column chromatography (73 % yield).

### Synthesis procedure for Abemaciclib preparation via C-N coupling reaction catalyzed by Co-MTL@MNPs

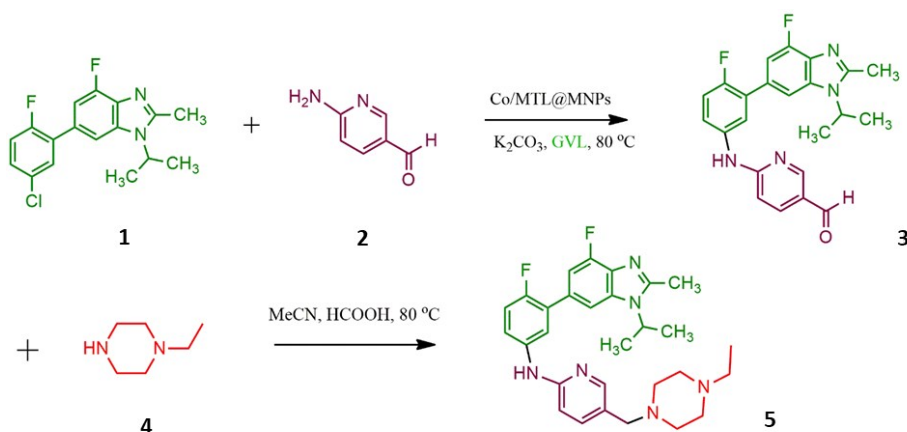

The compound **1** (6-(5-chloro-2-fluorophenyl)-4-fluoro-1-isopropyl-2-methyl-1H-benzo[d]imidazole) was prepared according to the method reported in literature based on the Suzuki coupling. In the following, A mixture of **1** (160.1 mg, 0.5 mmol), **2** 6-aminonicotinaldehyde (0.6 mmol, 73.2 mg), K<sub>2</sub>CO<sub>3</sub> (4 eq.) and Co-MTL@MNPs (10 mg, 0.22 mol% Co) in gamma-valerolactone (GVL) (5 mL) was stirred in a round bottom flask (50 mL) at 80 °C till the completion of reaction (24 h, monitored by TLC). Next, the reaction mixture was cooled to room temperature. The catalyst was removed by external magnet and washed with EtOAc (3×5 mL) followed by deionized water (3×10 mL). After extraction with ethyl acetate, the product (**3**) was purified by flash column chromatography using EtOAc-pet. ether (71 % yield). The mixture of **3** (162.4

mg, 0.4 mmol), **4** (1-ethylpiperazine) (57.1 mg, 0.5 mmol), Formic acid (4.6 mg, 0.1 mmol), trimethyl orthoformate ( $\text{CH}(\text{OCH}_3)_3$ ) (10.6 mg, 0.5 mmol), in acetonitrile (5 mL) was stirred in a round bottom flask (50 mL) at 80 °C till the completion of reaction (4 h, monitored by TLC). The reaction mixture was cooled to room temperature. After extraction with ethyl acetate, the product (**5**) was purified by flash column chromatography (56 % yield).

### The characterization of reused catalyst:

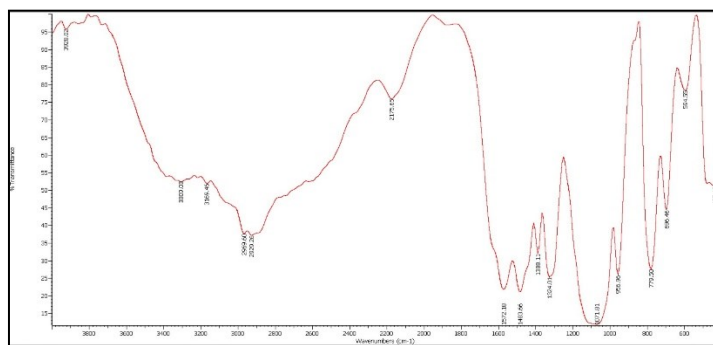

**Figure 1S.** The FT-IR spectra of reused catalyst

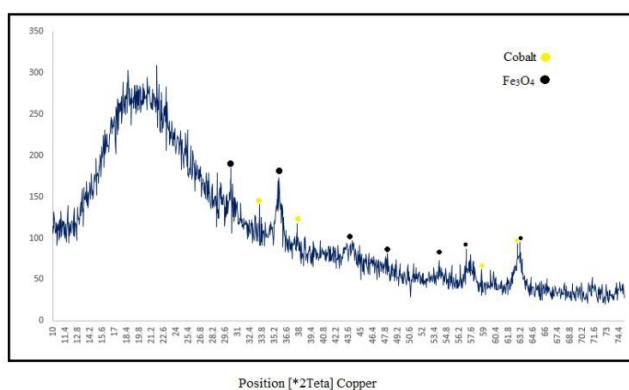

**Figure 2S.** The XRD pattern of reused catalyst

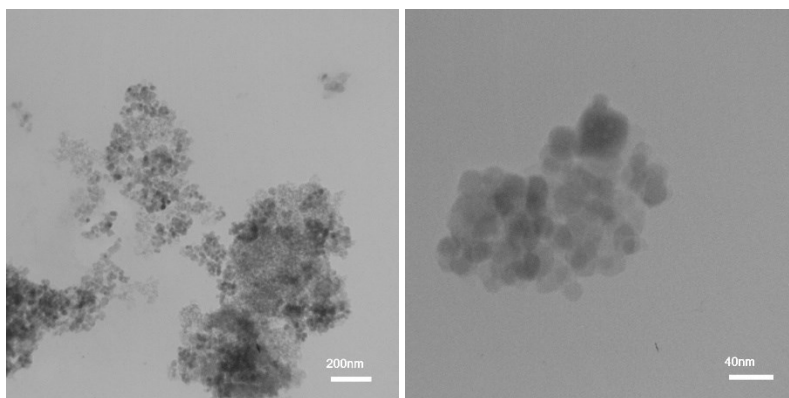

**Figure 3S.** The TEM images of the reused catalyst

<sup>1</sup>H NMR of selected products:

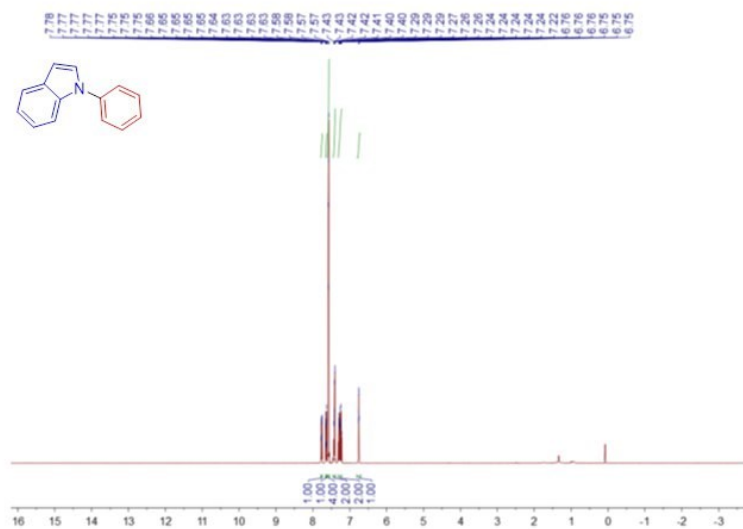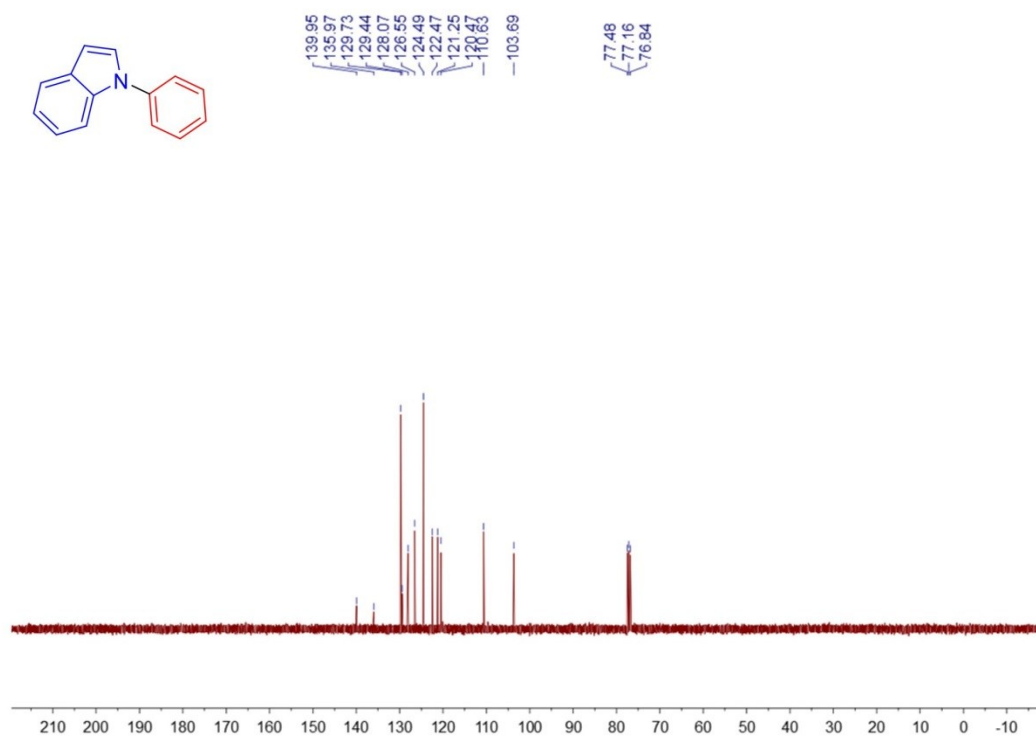

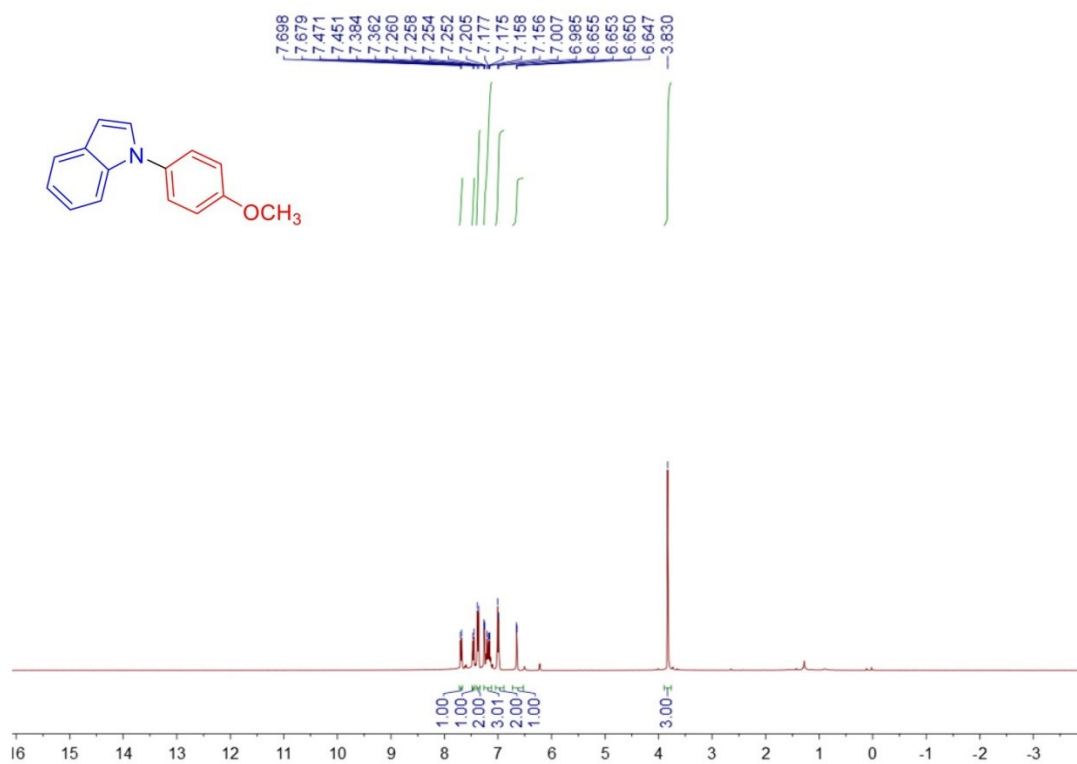

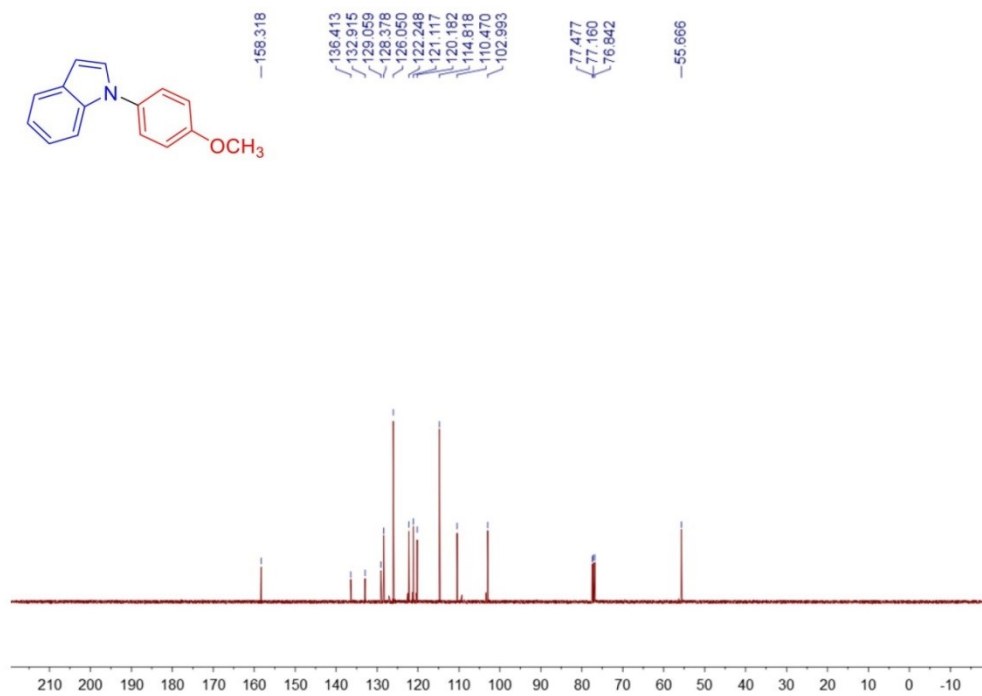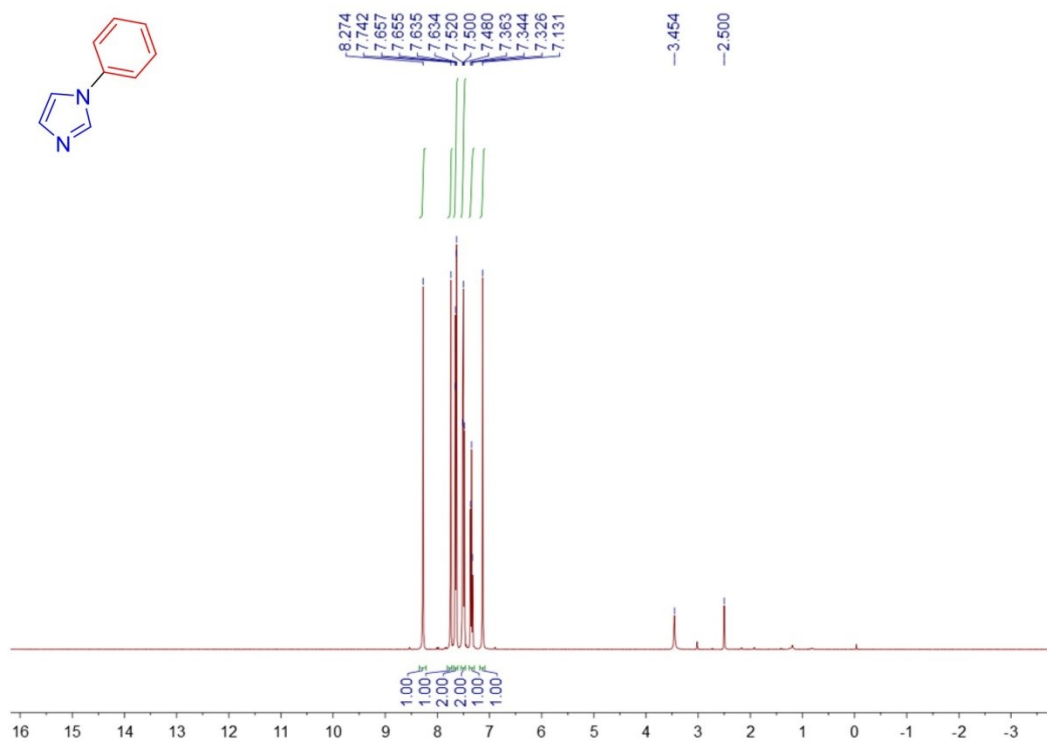

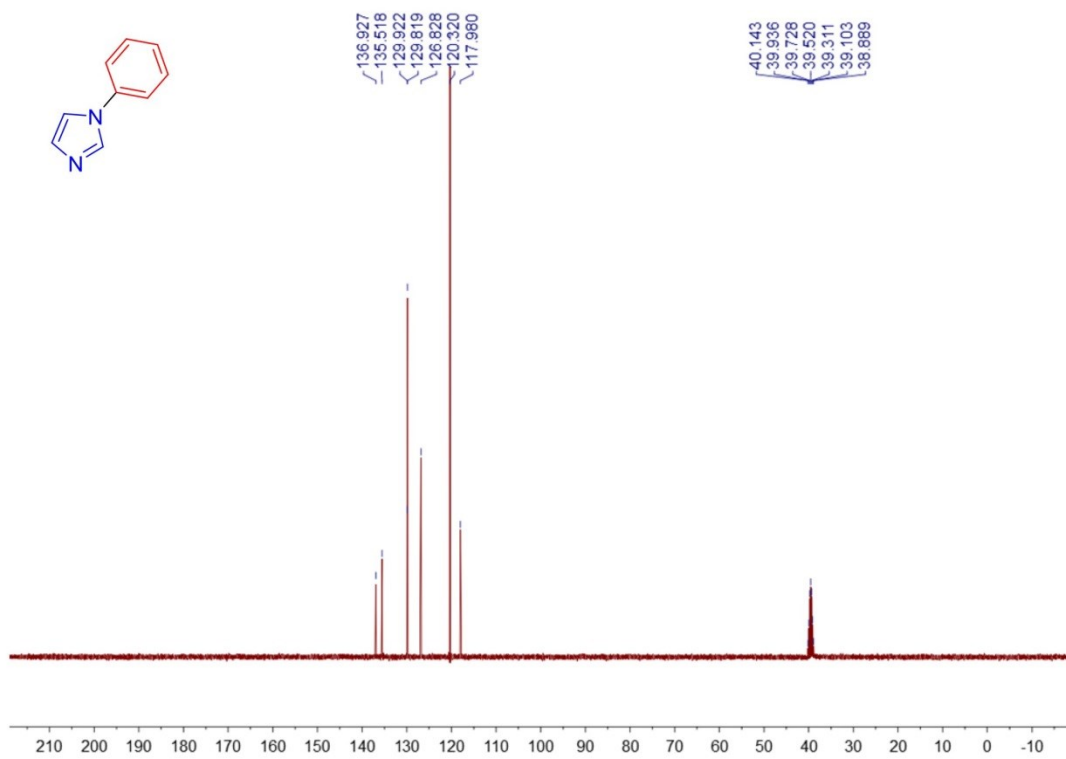

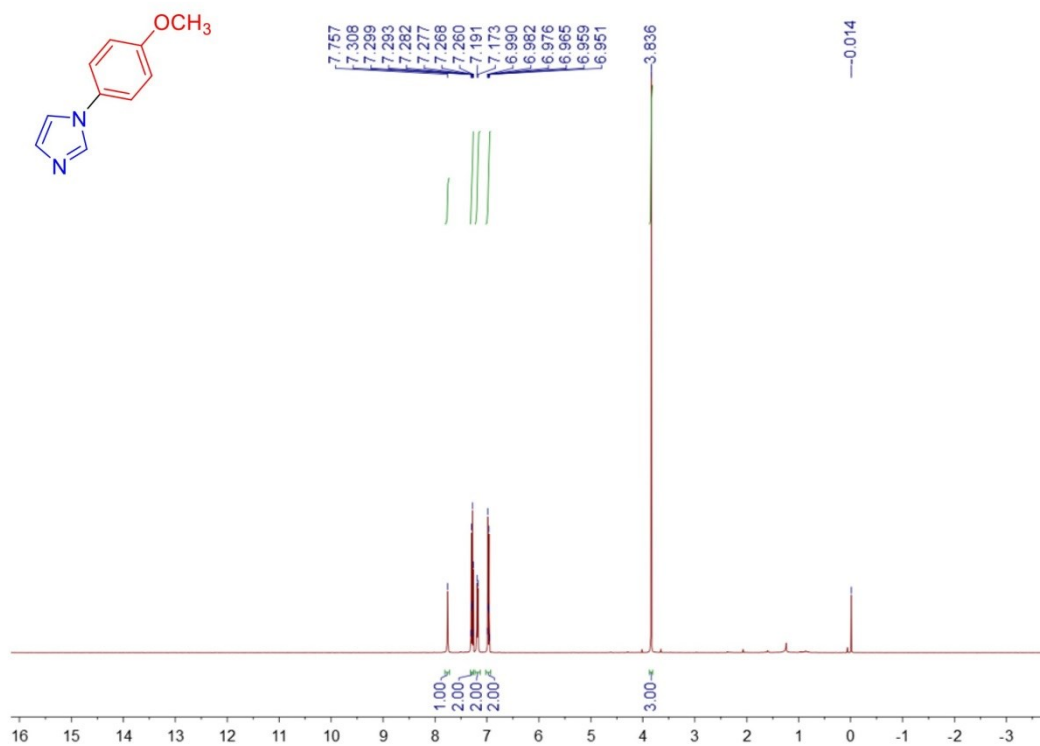

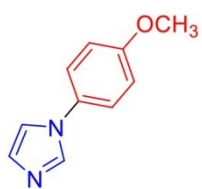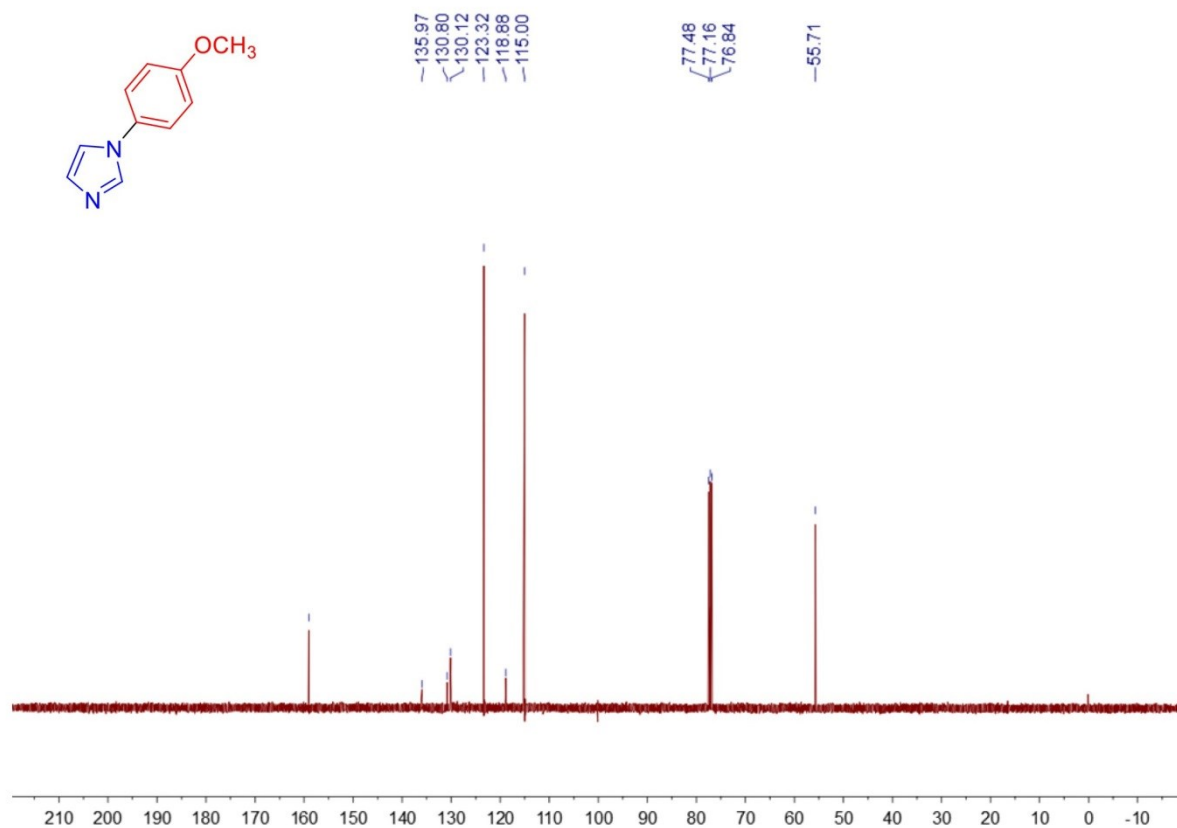

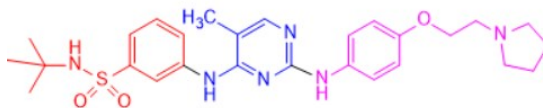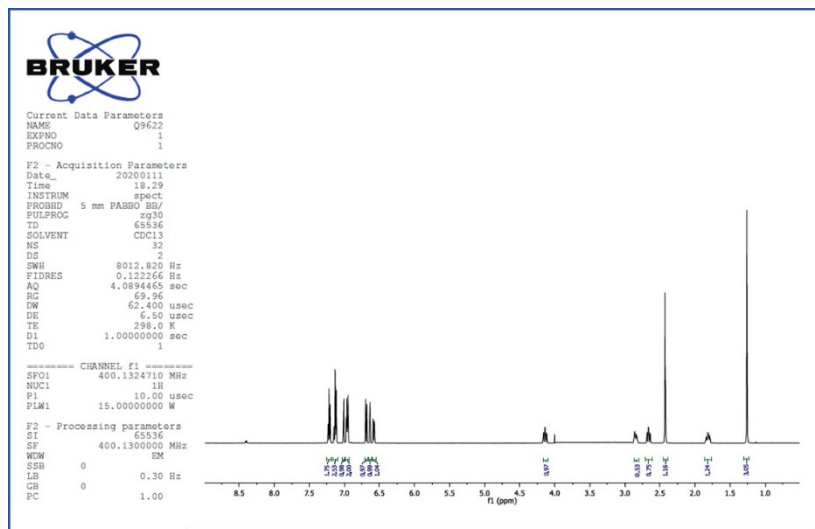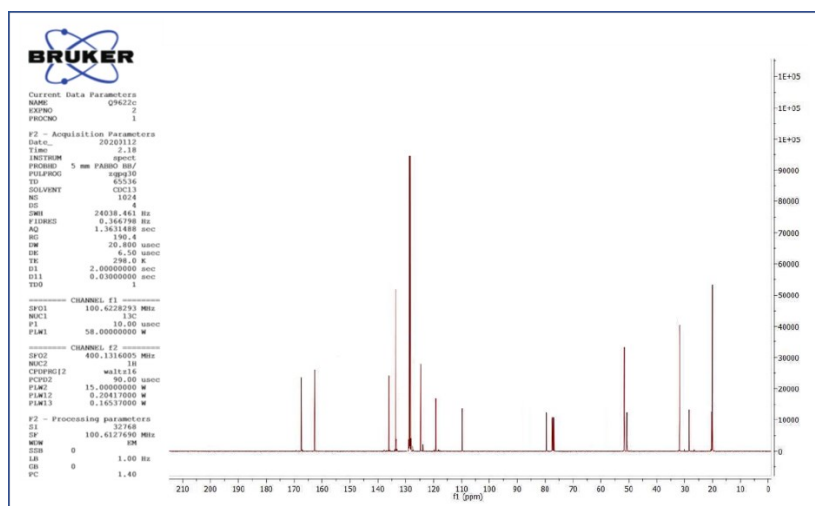

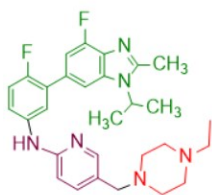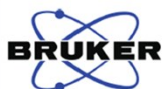

Current Data Parameters  
NAME Q9622  
EXPNO 1  
PROCNO 1

F2 - Acquisition Parameters  
Date\_ 20200111  
Time 18.29  
INSTRUM spect  
PROBHD 5 mm PABBO BB/  
PULPROG zg30  
TD 65536  
SOLVENT CDCl3  
NS 32  
DS 2  
SWH 8012.820 Hz  
FIDRES 0.122266 Hz  
AQ 4.0894465 sec  
RG 69.96  
DW 62.400 usec  
DE 6.50 usec  
TE 298.0 K  
D1 1.00000000 sec  
TD0 1

===== CHANNEL f1 =====  
SFO1 400.1324710 MHz  
NUC1 1H  
P1 10.00 usec  
PLW1 15.00000000 W

F2 - Processing Parameters  
SI 65536  
SF 400.1300000 MHz  
WDW EM  
SSB 0  
LB 0.30 Hz  
GB 0  
PC 1.00

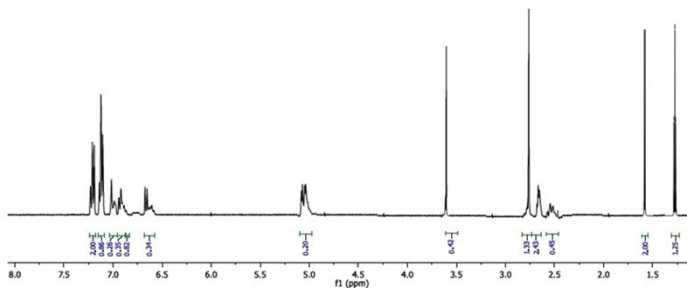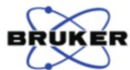

Current Data Parameters  
NAME Q9622  
EXPNO 2  
PROCNO 1

F2 - Acquisition Parameters  
Date\_ 2020112  
Time 2.18  
INSTRUM spect  
PROBHD 5 mm PABBO BB/  
PULPROG zgpg30  
TD 65536  
SOLVENT CDCl3  
NS 1024  
DS 4  
SWH 24038.461 Hz  
FIDRES 0.366798 Hz  
AQ 1.3631488 sec  
RG 190.4  
DW 20.800 usec  
DE 6.50 usec  
TE 298.0 K  
D1 2.00000000 sec  
D11 0.03000000 sec  
TD0 1

===== CHANNEL f1 =====  
SFO1 100.6228293 MHz  
NUC1 13C  
P1 10.00 usec  
PLW1 58.00000000 W

===== CHANNEL f2 =====  
SFO2 400.1316000 MHz  
NUC2 1H  
PULPROG2 waltz16  
PCPD2 90.00 usec  
PLW2 15.00000000 W  
PLW12 0.20170000 W  
PLW13 0.16537000 W

F2 - Processing Parameters  
SI 32768  
SF 100.6127690 MHz  
WDW EM  
SSB 0  
LB 1.00 Hz  
GB 0  
PC 1.40

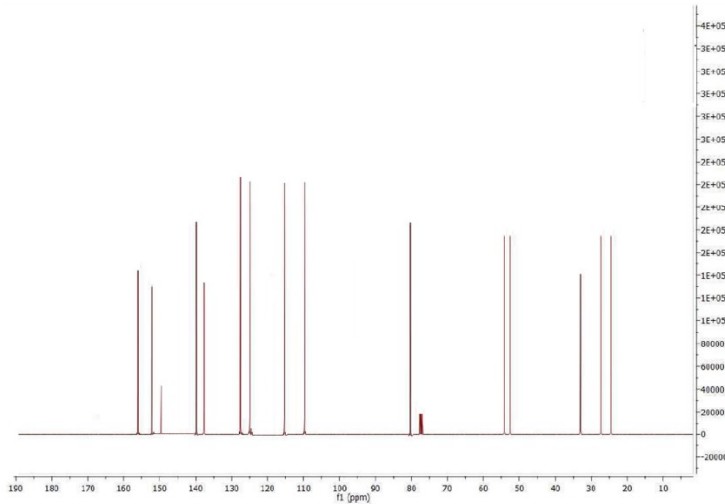

Supplement: d1gc00518a1.pdf [file d1gc00518a1.pdf]
